# Supplementary material for: Next Generation Sequencing Identifies Five Novel Mutations in Lebanese Patients with Bardet–Biedl and Usher Syndromes
Source: MDPI journal article supplement (doi:10.3390/genes10121047), 2019-12-16
Supplement: s1 [file s1]

**Table S1.** Criteria used to classify sequence variants according to ACMG guidelines (46).

| <b>Variant ID</b> | <b>Evidences of pathogenicity</b>                                                                 | <b>Class</b>           |
|-------------------|---------------------------------------------------------------------------------------------------|------------------------|
| M1                | 1 moderate evidence (PM2) and 4 supporting evidences (PP1-PP2-PP3-PP4)                            | Likely pathogenic      |
| M2                | 1 moderate evidence (PM2) and 4 supporting evidences (PP1-PP2-PP3-PP4)                            | Likely pathogenic      |
| M3                | 1 very strong evidence (PVS1), 1 moderate evidence (PM2) and 3 supporting evidences (PP1-PP3-PP4) | Pathogenic             |
| M4                | 2 moderate evidences (PM2-PM3) and 3 supporting evidences (PP1-PP2-PP4)                           | Likely pathogenic      |
| M5                | 4 supporting evidences (PP1-PP2-PP3-PP4)                                                          | Uncertain significance |
| M6                | 1 moderate evidence (PM2) and 4 supporting evidences (PP1-PP2-PP3-PP4)                            | Likely pathogenic      |

M: mutation.

**Table S2:** Incidental findings detected by NGS in inherited retinal disorders genes other than Bradet Biedl and Usher syndromes.

| Index Patient<br>(corresponding disease) | Gene          | Associated IRD | Status | Exon | rs ID      | Nucleotide Exchange | Amino Acid Change | Frequencies               | PolyPhen-2        | SIFT |
|------------------------------------------|---------------|----------------|--------|------|------------|---------------------|-------------------|---------------------------|-------------------|------|
| <b>FA4: V.3</b><br><b>(BBS)</b>          | <i>CDH23</i>  | USH            | HTZ    | 67   | rs76399310 | c.9587_9589delACA   | p.Asn3197del      | 0.0000643<br>(gnomAD)     | -                 | -    |
|                                          | NM_022124.5   |                |        |      | 0          |                     |                   | 0.0000159<br>(TOPMed)     |                   |      |
|                                          |               |                |        |      |            |                     |                   | Never Hom                 |                   |      |
|                                          | <i>IFT140</i> | RP or LCA      | HTZ    | 20   | rs20087669 | c.2569G>A           | p.Gly857Ser       | 0.003545<br>(gnomAD)/8HOM | Probably damaging | D    |
|                                          | NM_014714.4   |                |        |      | 6          |                     |                   | 0.001911<br>(TOPMed)/1HOM |                   |      |
|                                          | <i>RBP3</i>   | RP             | HTZ    | 1    | rs14428991 | c.1795A>G           | p.Ile599Val       | 0.001144<br>(gnomAD)      | Benign            | D    |
|                                          | NM_002900.3   |                |        |      | 2          |                     |                   | 0.0009795<br>(TOPMed)     |                   |      |
|                                          |               |                |        |      |            |                     |                   | Never Hom                 |                   |      |
|                                          | <i>CDHR1</i>  | CRD            | HTZ    | 8    | rs74738807 | c.764T>A            | p.Val255Glu       | 0.00002386<br>(gnomAD)    | Possibly damaging | D    |
|                                          | NM_033100.4   |                |        |      | 6          |                     |                   | 0 (TOPMed)                |                   |      |

Never Hom

|                    |                |     |     |    |             |                    |             |                  |                         |          |             |
|--------------------|----------------|-----|-----|----|-------------|--------------------|-------------|------------------|-------------------------|----------|-------------|
| <b>FB22: II.1</b>  | <i>HGSNAT</i>  | RP  | HTZ | 1  | -           | c.11C>A            |             | p.Ala4Glu        | 0 (gnomAD)              | Benign   | -           |
| <b>(BBS)</b>       | NM_152419.3    |     |     |    |             |                    |             |                  | 0 (TOPMed)              |          |             |
|                    |                |     |     |    |             |                    |             |                  | Never Hom               |          |             |
|                    | <i>EYS</i>     | RP  | HTZ | 4  | -           | c.476G>C           | p.Cys159Ser | p.Cys159Ser      | 0 (gnomAD)              | Probably | D           |
|                    | NM_001292009.1 |     |     |    |             |                    |             |                  | 0.00000796 (TOPMed)     | damaging |             |
|                    |                |     |     |    |             |                    |             |                  | Never Hom               |          |             |
|                    | <i>CDH23</i>   | USH | HTZ | 68 | rs200124827 | c.9928C>T          |             | p.Arg3310Cys     | 0.0002158 (gnomAD)      | Possibly | D (low      |
|                    | NM_022124.5    |     |     |    |             |                    |             |                  | 0.0001832 (TOPMed)      | damaging | confidence) |
| <b>FD10: III.3</b> | <i>GUCY2D</i>  | LCA | HTZ | 4  | rs140638938 | c.1315G>A          |             | p.Gly439Arg      | 0.000334 (gnomAD)//1Hom | Probably | D           |
| <b>(USH)</b>       | NM_000180.4    |     |     |    |             |                    |             |                  | 0.0000079 (TOPMed)      | damaging |             |
|                    | <i>GUCY2D</i>  | LCA | HTZ | 20 | rs552184470 | c.124_129delCTGCTT |             | p.Leu44_Leu45del | 0.001913 (gnomAD)       | -        | -           |
|                    | NM_000180.4    |     |     |    |             |                    |             |                  | /3Hom                   |          |             |

|                             |                                                |     |    |                 |           |             |                                |                          |   |
|-----------------------------|------------------------------------------------|-----|----|-----------------|-----------|-------------|--------------------------------|--------------------------|---|
|                             |                                                |     |    |                 |           |             | 0.002087<br>(TOPMed)<br>/3Hom  |                          |   |
| <i>PDE6A</i><br>NM_000440.3 | RP                                             | HTZ | 14 | rs76500719<br>6 | c.1730C>T | p.Thr577Met | 0.000007962<br>(gnomAD)        | Possibly<br>damagin<br>g | D |
|                             |                                                |     |    |                 |           |             | 0.0000079<br>(TOPMed)          |                          |   |
|                             |                                                |     |    |                 |           |             | Never Hom                      |                          |   |
| <i>RGS9</i><br>NM_003835.4  | recessive<br>delayed<br>cone<br>adaptatio<br>n | HTZ | 5  | rs20199788<br>8 | c.314C>G  | p.Thr105Arg | 0.001901<br>(gnomAD)//1Ho<br>m | Probably<br>damagin<br>g | D |
|                             |                                                |     |    |                 |           |             | 0.001776<br>(TOPMed)           |                          |   |

---

HTZ: heterozygous; HOM: homozygous; D: deleterious, USH: Usher syndrome; RP: retinitis pigmentosa; LCA: Leber's congenital amaurosis; CRD: cone rod dystrophy.
